# Supplementary material
Source: MDPI journal article supplement (https://www.mdpi.com/2073-4441/16/10/1345)
Supplement: s1 [file s1]

## Supported Information

### **Mg-Fe layered double hydroxides/polyacrylonitrile nanofibers for solar-light induced peroxymonosulfate elimination of tetracycline hydrochloride**

Hao Peng <sup>a</sup>, Beilei Ye <sup>b</sup>, Meiying Luo <sup>b</sup>, Xiaogang Zheng <sup>b,\*</sup>

<sup>a</sup> College of Chemistry and Chemical Engineering, Yangtze Normal University, Chongqing 408100, China

<sup>b</sup> College of Chemistry and Chemical Engineering, Neijiang Normal University, Neijiang, Sichuan 641100, PR China.

#### **S1. Characterization**

CuS-Mg/S-BC samples were evaluated by X-ray diffraction (XRD, Bruker D8), field emission scanning electron microscopy (FE-SEM, Phenom Pharos), inductively coupled plasma optical emission spectrometer (ICP-OES, Optima 5300DV), X-ray photoelectron spectroscopy (XPS, Escalab 250XI), Fourier-transform infrared spectra (FT-IR, Bruker Alpha, Germany), Zeta potential (Brookhaven, NanoBrook Omni), UV-vis diffuse reflectance spectra (UV-vis DRS, Shimadzu UV-2600), photoluminescence (PL, FLSP 920, excitation at 380 nm), and electron spin resonance (ESR, Bruker A300, Germany). In addition, the photoelectrochemical properties were evaluated on a photoelectric instrument (CEL-PECX2000, Beijing CEL Tech. Co., Ltd., China) equipped with a Vertex. C. EIS electrochemistry workstation (Ivium Technologies B.V., Holland) and a Xe lamp ( $\lambda > 420$  nm,  $240 \text{ mW cm}^{-2}$ ). In the three-electrode system of  $0.1 \text{ mol L}^{-1} \text{ Na}_2\text{SO}_4$  solution, the working electrode was indium tin oxide glass covered with the obtained photocatalyst film ( $0.5 \text{ cm}^2$ ), the counter electrode was Ag/AgCl electrolyte, and the reference electrode was calomel electrode. The working electrode was prepared as following: 20 mg bulks were dispersed into 1 mL DMF (N,N-dimethylformamide) and 20  $\mu\text{L}$  Nafion@117 solution, then 50  $\mu\text{L}$  solution was dropped onto indium tin oxide glass with an area of  $0.5 \times 0.5 \text{ cm}^2$ , and further the obtained electrode was dried at 363 K for 6 h.

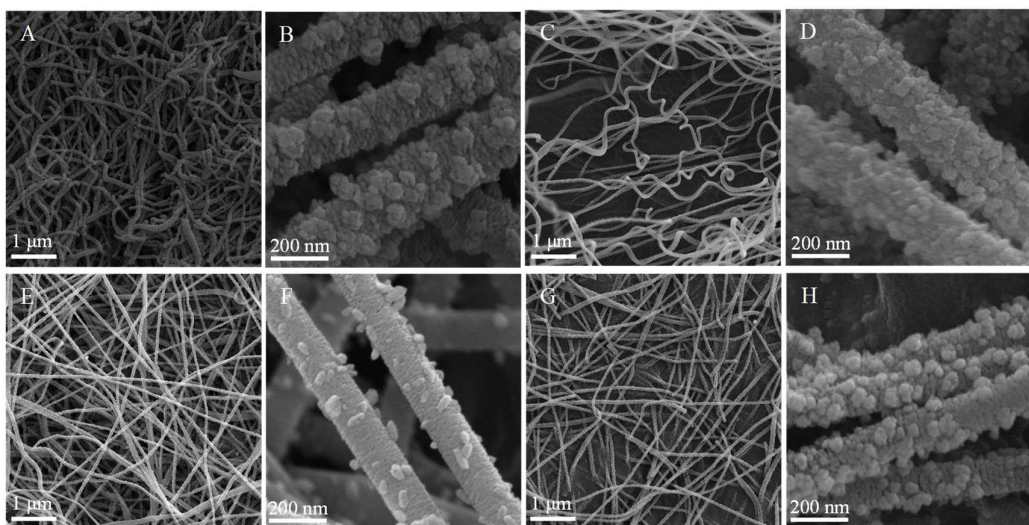

**Figure S1.** SEM images of MgFe/PAN (A and B), MgFe<sub>2</sub>/PAN (C and D), MgFe<sub>3</sub>/PAN (E and F), and Mg<sub>2</sub>Fe/PAN (G and H).

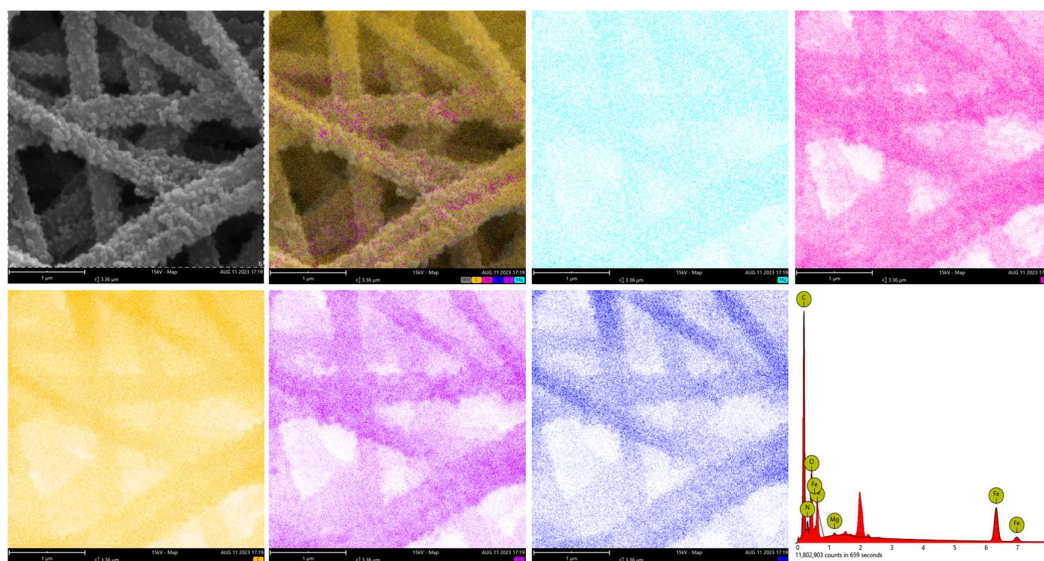

**Figure S2.** Elemental mapping images and EDX pattern of MgFe<sub>2</sub>/PAN.

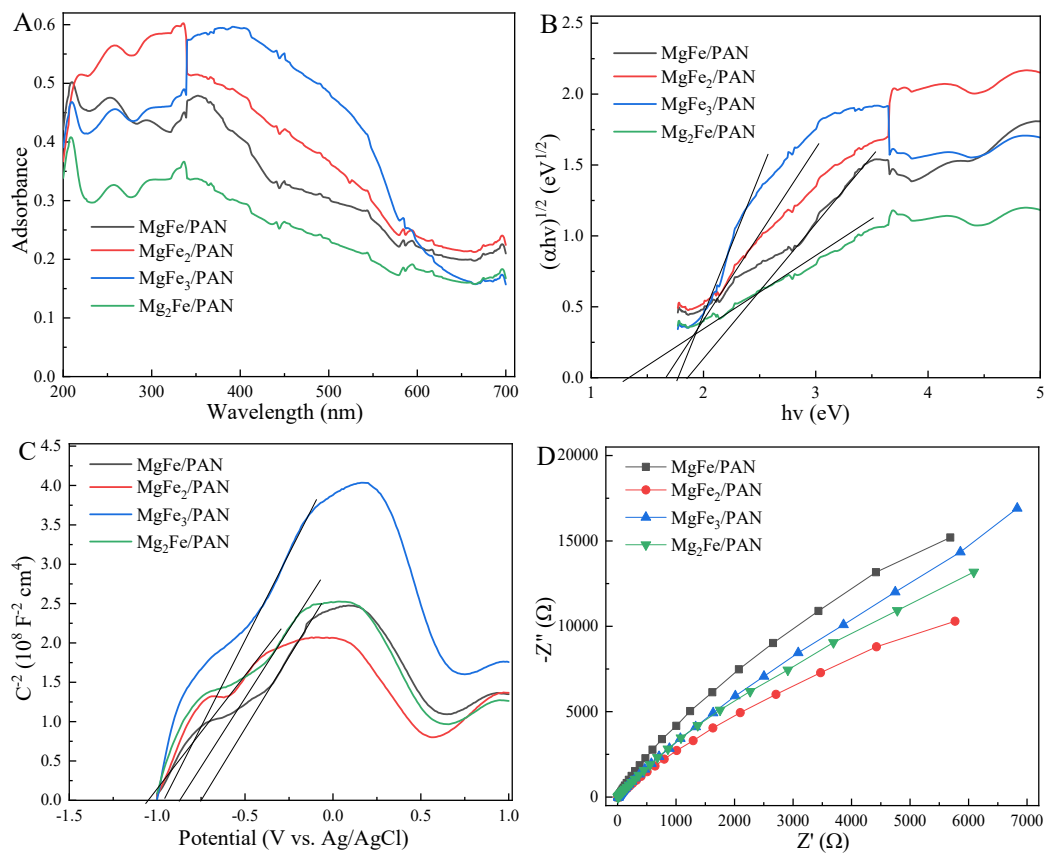

**Figure S3.** UV-vis DRS curves (A), plots of  $(h\nu)$  versus  $(\alpha h\nu)^{1/2}$ , Mott-Schottky curves (C), and electrochemical impedance spectra (D) of MgFe/PAN with various Mg/Fe molar ratios.

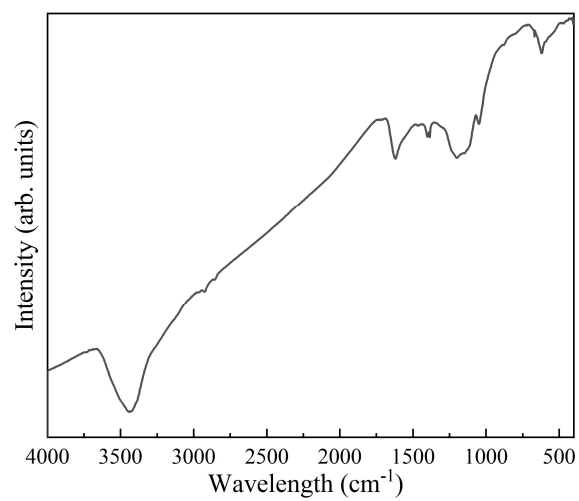

**Figure S4.** FT-IR spectra of PAN nanofibers.

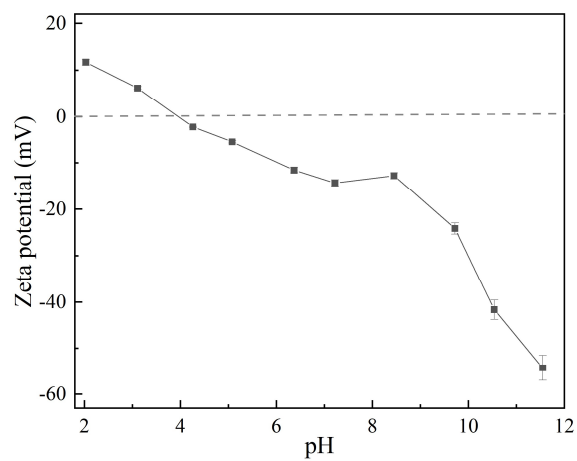

**Figure S5.** Zeta potential curve of MgFe<sub>2</sub>/PAN.

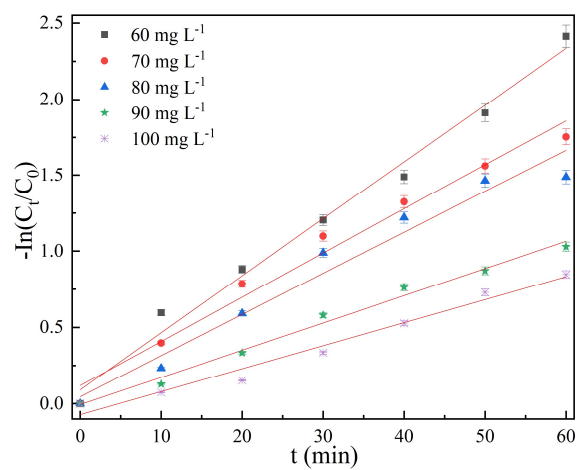

**Figure S6.** Effect of TCH concentration on the photo-PMS kinetics of MgFe<sub>2</sub>/PAN for TCH removal.

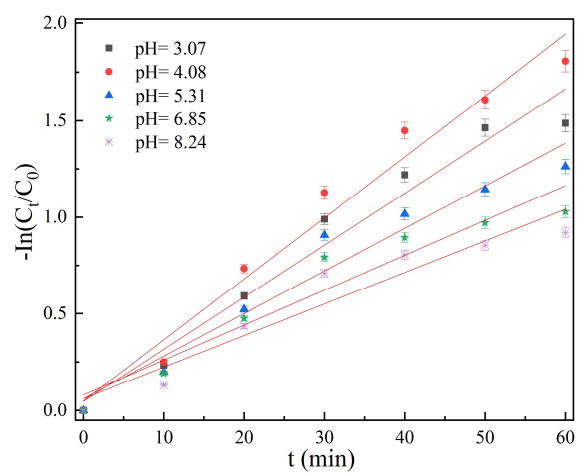

**Figure S7.** Effect of pH on the photo-PMS kinetics of MgFe<sub>2</sub>/PAN for TCH removal.

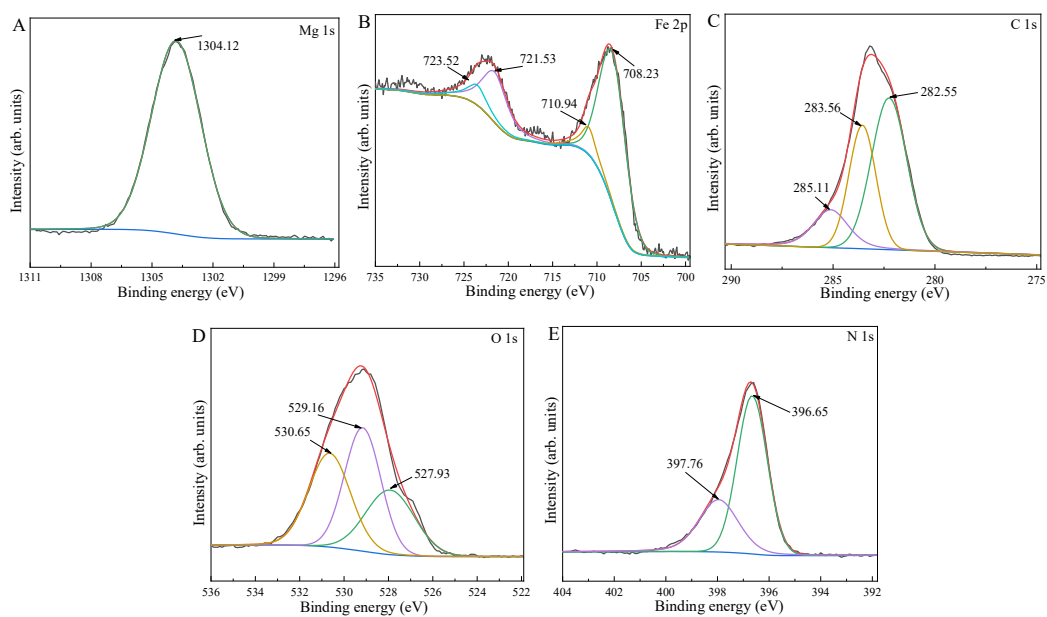

**Figure S8.** Mg 1s (A), Fe 2p (B), C 1s (C), O 1s (D), and N 1s (E) XPS spectra of used  $\text{MgFe}_2/\text{PAN}$ .

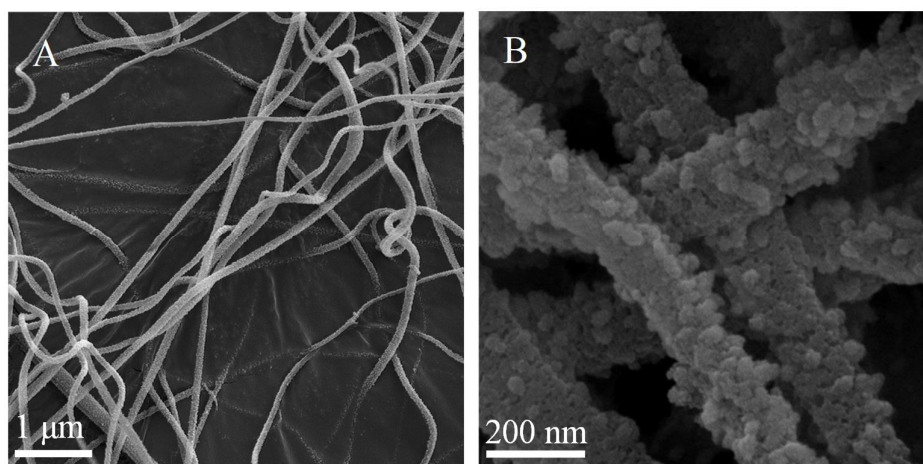

**Figure S9.** SEM images of used MgFe<sub>2</sub>/PAN.

**Table S1.** Band gap energies and electronic properties of PAN and Mg-Fe/PAN composites.

| Samples                  | Metal content |        | $E_g$ (eV) | $E_{FB}$ (V) | $E_{CB}$ (eV) <sup>a</sup> | $E_{VB}$ (eV) <sup>b</sup> |
|--------------------------|---------------|--------|------------|--------------|----------------------------|----------------------------|
|                          | Mg (%)        | Fe (%) |            |              |                            |                            |
| PAN nanofibers           | /             | /      | 3.84       | -1.30        | -1.10                      | 2.74                       |
| Mg(OH) <sub>2</sub> /PAN | 0.56          | /      | 2.83       | -1.12        | -0.92                      | 1.91                       |
| Fe(OH) <sub>3</sub> /PAN | /             | 1.20   | 1.75       | -0.96        | -0.76                      | 0.99                       |
| MgFe/PAN                 | 0.56          | 1.20   | 1.87       | -0.75        | -0.55                      | 1.32                       |
| MgFe <sub>2</sub> /PAN   | 0.53          | 1.35   | 1.67       | -1.03        | -0.83                      | 0.84                       |
| MgFe <sub>3</sub> /PAN   | 0.50          | 1.12   | 1.78       | -0.96        | -0.76                      | 1.02                       |
| Mg <sub>2</sub> Fe/PAN   | 0.61          | 1.22   | 1.34       | -0.87        | -0.67                      | 0.67                       |

<sup>a</sup>  $E_{CB} = E_{FB} + 0.197$  (0.197 is the standard electrode potential of Ag/AgCl electrode). <sup>b</sup>  $E_{VB} = E_g + E_{CB}$ .

**Table S2.** Degradation capacities of MgFe<sub>2</sub>/PAN and reported materials for TCH elimination.

| Photocatalyst                                   | Light source   | Catalyst content (g L <sup>-1</sup> ) | TCH Conc. (mg L <sup>-1</sup> ) | Time (min) | Degradation efficiency (%) | Ref. |
|-------------------------------------------------|----------------|---------------------------------------|---------------------------------|------------|----------------------------|------|
| g-C <sub>3</sub> N <sub>4</sub> /LDH0.3-OVs/Vis | Xe lamp        | 0.2                                   | 10                              | 90         | 95.00                      | [51] |
| PCNFs@TiO <sub>2</sub> -CuTCPP                  | Xe lamp, 300 W | 0.25                                  | 40                              | 240        | 89.90                      | [52] |
| MIL-88B(Fe)/ZnTi-LDH                            | Xe lamp, 300W  | 0.2                                   | 30                              | 100        | 93.51                      | [53] |
| NiFe-LDH-V <sub>Ni</sub> /PS                    | Vis            | 0.2                                   | 30                              | 90         | 80.00                      | [50] |
| Ni <sub>2</sub> P/NiCo-LDH                      | Xe lamp,       | 0.1                                   | 10                              | 90         | 46.00                      | [54] |

|                                         |                    |     |    |     |       |              |
|-----------------------------------------|--------------------|-----|----|-----|-------|--------------|
|                                         | 350W               |     |    |     |       |              |
| NiCoMn-LDH                              | Xe lamp,<br>150W   | 0.3 | 20 | 120 | 96.00 | [55]         |
| CoAl-LDH/Ti <sub>3</sub> C <sub>2</sub> | Xe lamp,<br>300 W  | 0.5 | 25 | 120 | 85.00 | [56]         |
| FeNi-LDH/Ti <sub>3</sub> C <sub>2</sub> | Xe lamp,<br>300 W  | 0.2 | 20 | 120 | 94.70 | [25]         |
| Fe <sub>3</sub> O <sub>4</sub> /FeP     | Xe lamp,<br>1000 W | 0.4 | 50 | 210 | 88.00 | [57]         |
| ZIF-8/MnFe <sub>2</sub> O <sub>4</sub>  | Xe lamp,<br>300 W  | 0.3 | 20 | 120 | 90.20 | [58]         |
| MgFe <sub>2</sub> /PAN                  | Xe lamp,<br>300 W  | 0.4 | 80 | 120 | 81.31 | This<br>work |
